# Supplementary material for: The phosphopantetheinyl transferases: catalysis of a post-translational modification crucial for life
Source: Royal Society of Chemistry journal article supplement (doi:10.1039/c3np70054b), 2013-11-29
Supplement: c3np70054b.pdf [file c3np70054b.pdf]

## Supporting Information

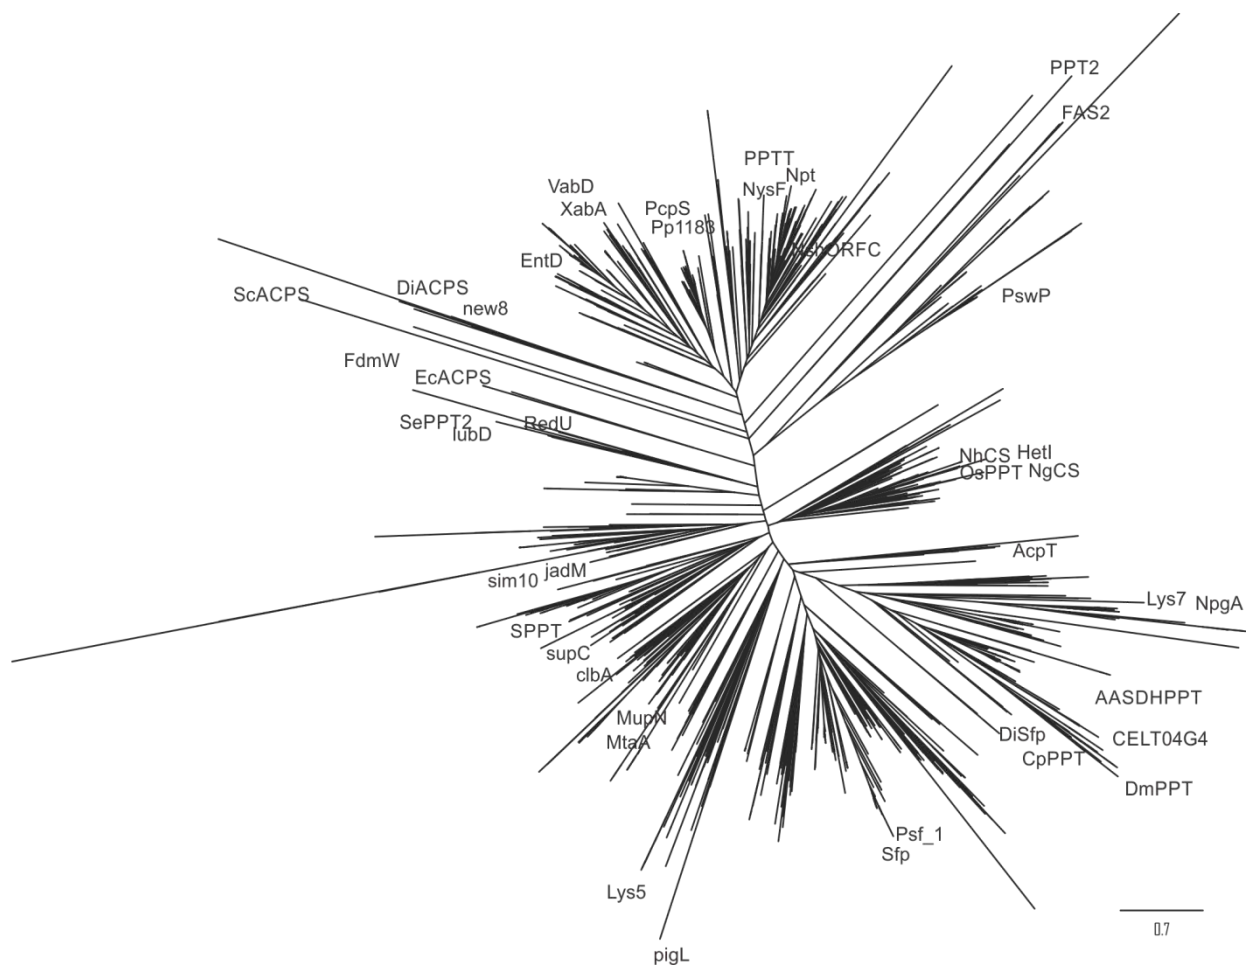

**Fig. S1** - Unbiased phylogenetic tree constructed from ~1700 unique PPTase sequences using Fasttree. The ~60 annotated PPTases are shown. Unrooted phylogenetic tree was constructed in the following way: several PPTases, including Sfp, AASDHPPT and PptTwere separately blasted against the UniProt database and top 500 hits combined, until >3000 sequences were collected. Duplicates were removed, leading to 1700 unique sequences. Taxon names were condensed using Mesquite and protein sequences aligned using Muscle. Fasttree was used to create a phylogenetic tree and Dendroscope and Figtree used to visualize the tree.
